# Supplementary material for: Direct Whole-Genome Sequencing of Sputum Accurately Identifies Drug-Resistant Mycobacterium tuberculosis Faster than MGIT Culture Sequencing
Source: PubMed Central journal article supplement (PMC6062781; doi:10.1128/jcm.00666-18), 2018-07-26
Supplement: JCM.00666-18_zjm999096043s1.pdf [file JCM.00666-18_zjm999096043s1.pdf]

**Supplementary materials**

**Supplementary table 1.** The ten single nucleotide variants that were discordant at consensus level between sputum and MGIT samples of nine patients.

| Patient   | Position<br>in H37Rv | Reference<br>base | Variant<br>base | Sputum                 |                          |                              | MGIT                   |                          |                              |
|-----------|----------------------|-------------------|-----------------|------------------------|--------------------------|------------------------------|------------------------|--------------------------|------------------------------|
|           |                      |                   |                 | Total<br>read<br>depth | Variant<br>read<br>depth | Variant<br>read<br>frequency | Total<br>read<br>depth | Variant<br>read<br>depth | Variant<br>read<br>frequency |
| BH052SA   | 2339240              | G                 | A T             | 345                    | 150                      | 43.5                         | 59                     | 37                       | 62.7                         |
| BH056ESDS | 2945167              | G                 |                 | 345                    | 211                      | 61.2                         | 65                     | 27                       | 41.5                         |
| RF001SH   | 2339240              | G                 | A               | 267                    | 202                      | 75.7                         | 197                    | 62                       | 31.5                         |
| RF002AH   | 1415643              | G                 | A               | 105                    | 55                       | 52.4                         | 604                    | 283                      | 46.9                         |
| RF003JV   | 2262026              | T                 | G               | 44                     | 25                       | 56.8                         | 128                    | 52                       | 40.6                         |
| RF017MW   | 4317344              | C                 | T               | 145                    | 61                       | 42.1                         | 239                    | 138                      | 57.7                         |
| RF021RC   | 2639192              | G                 | A               | 290                    | 157                      | 54.1                         | 112                    | 41                       | 36.6                         |
| WH017KL   | 1096633              | T                 | G               | 53                     | 25                       | 47.2                         | 392                    | 216                      | 55.1                         |
|           | 2945167              | G                 | T               | 72                     | 33                       | 45.8                         | 487                    | 266                      | 54.6                         |
| WH035CL   | 1481337              | G                 | A               | 102                    | 59                       | 57.8                         | 169                    | 77                       | 45.6                         |

**a**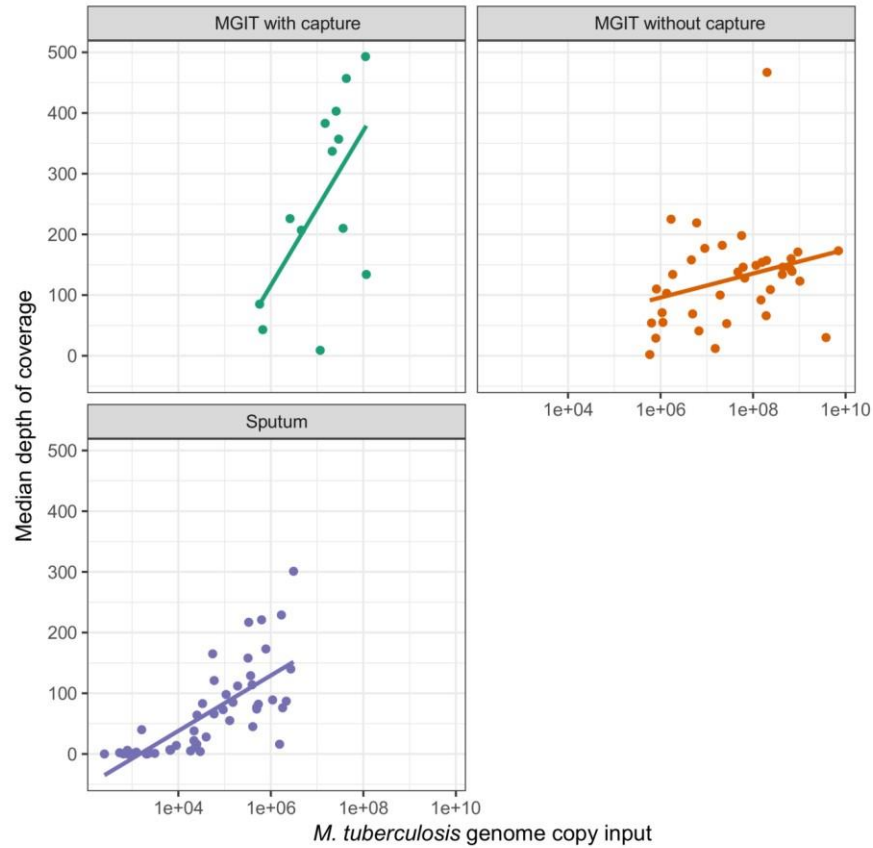**b**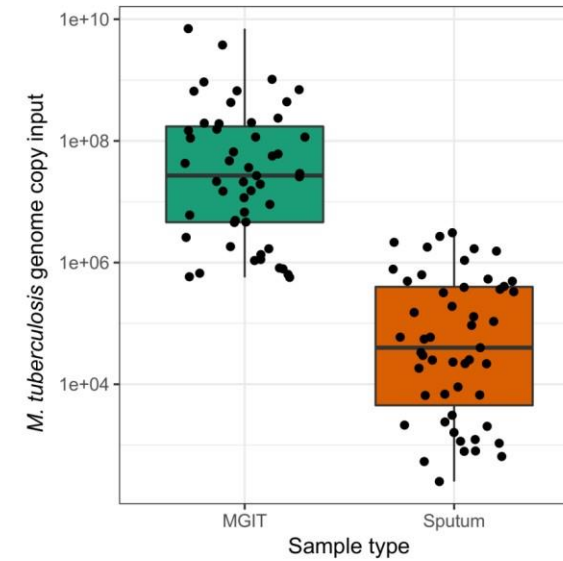

**Supplementary figure 1.** (A) Effect of genome copy input on the median depth of coverage recovered for each sample stratified by whether sample was prepared from sputum using SureSelectXT (Sputum), MGIT with SureSelectXT (MGIT with capture) or MGIT with NebNext Ultra II (MGIT without capture). Each line plotted through the points represents linear regression of coverage against genome copy input. (B) Boxplot showing difference in the estimated genome copies available for library preparation for sputa compared to MGIT cultures.

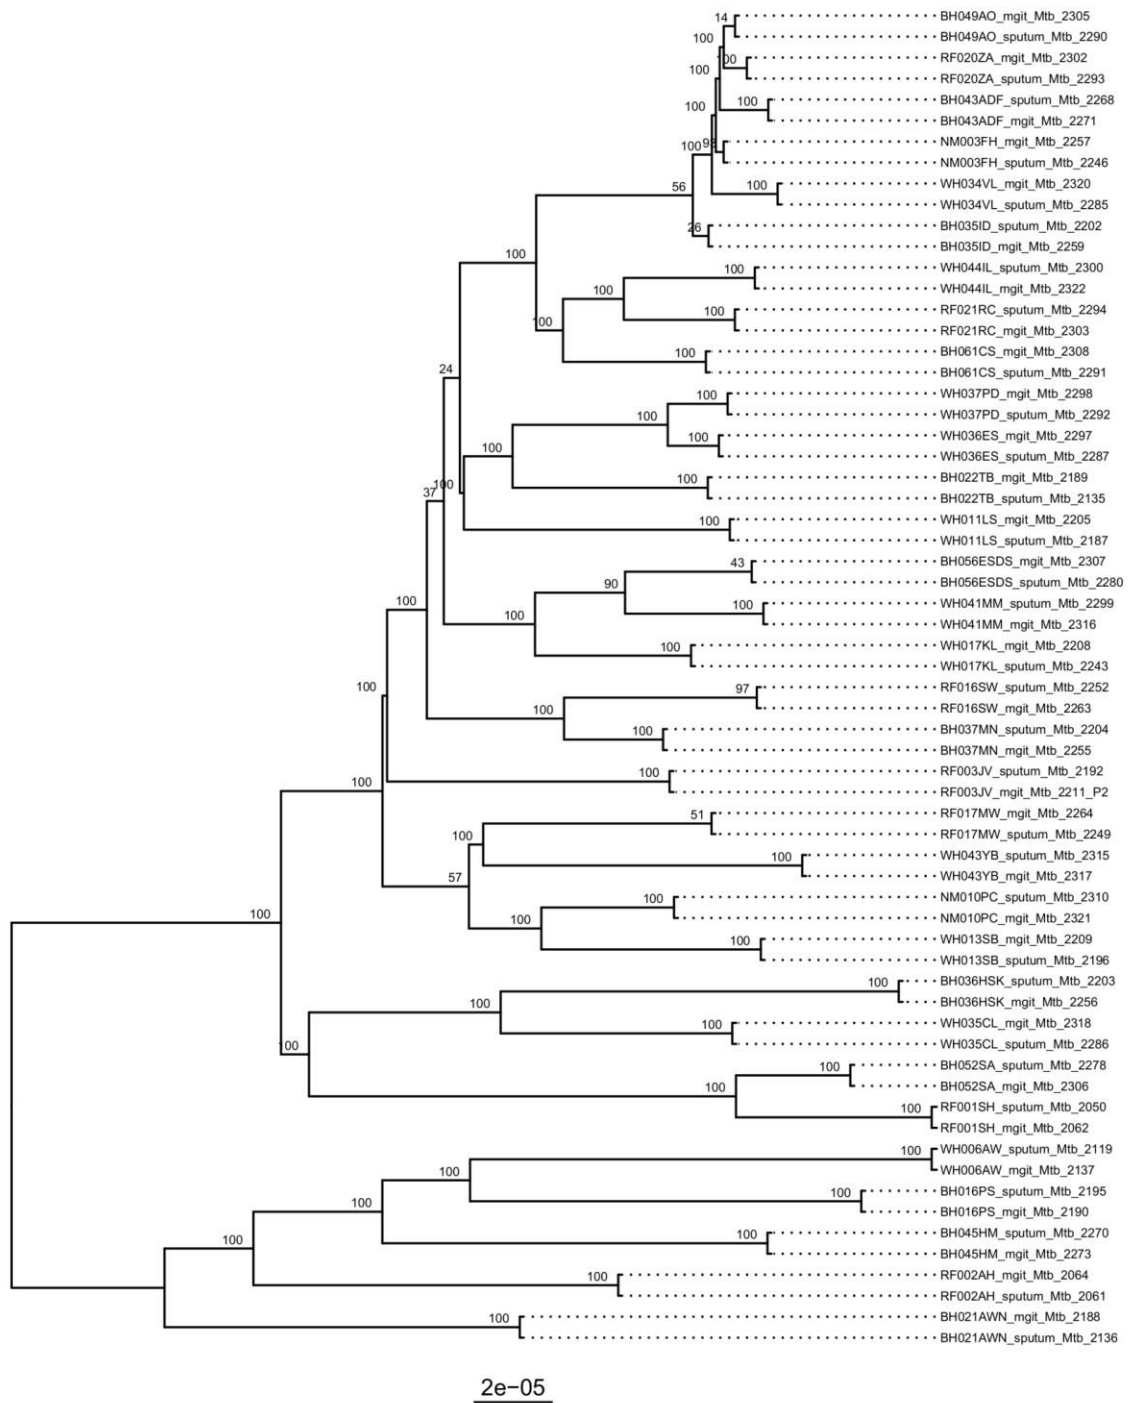

**Supplementary figure 2.** Maximum likelihood tree of whole genomes from paired sputum and MGIT samples from the same patients. Bootstrap confidence values are reported from 99 replicates and the tree is midpoint rooted. Scale bar represents the number of substitutions per site.

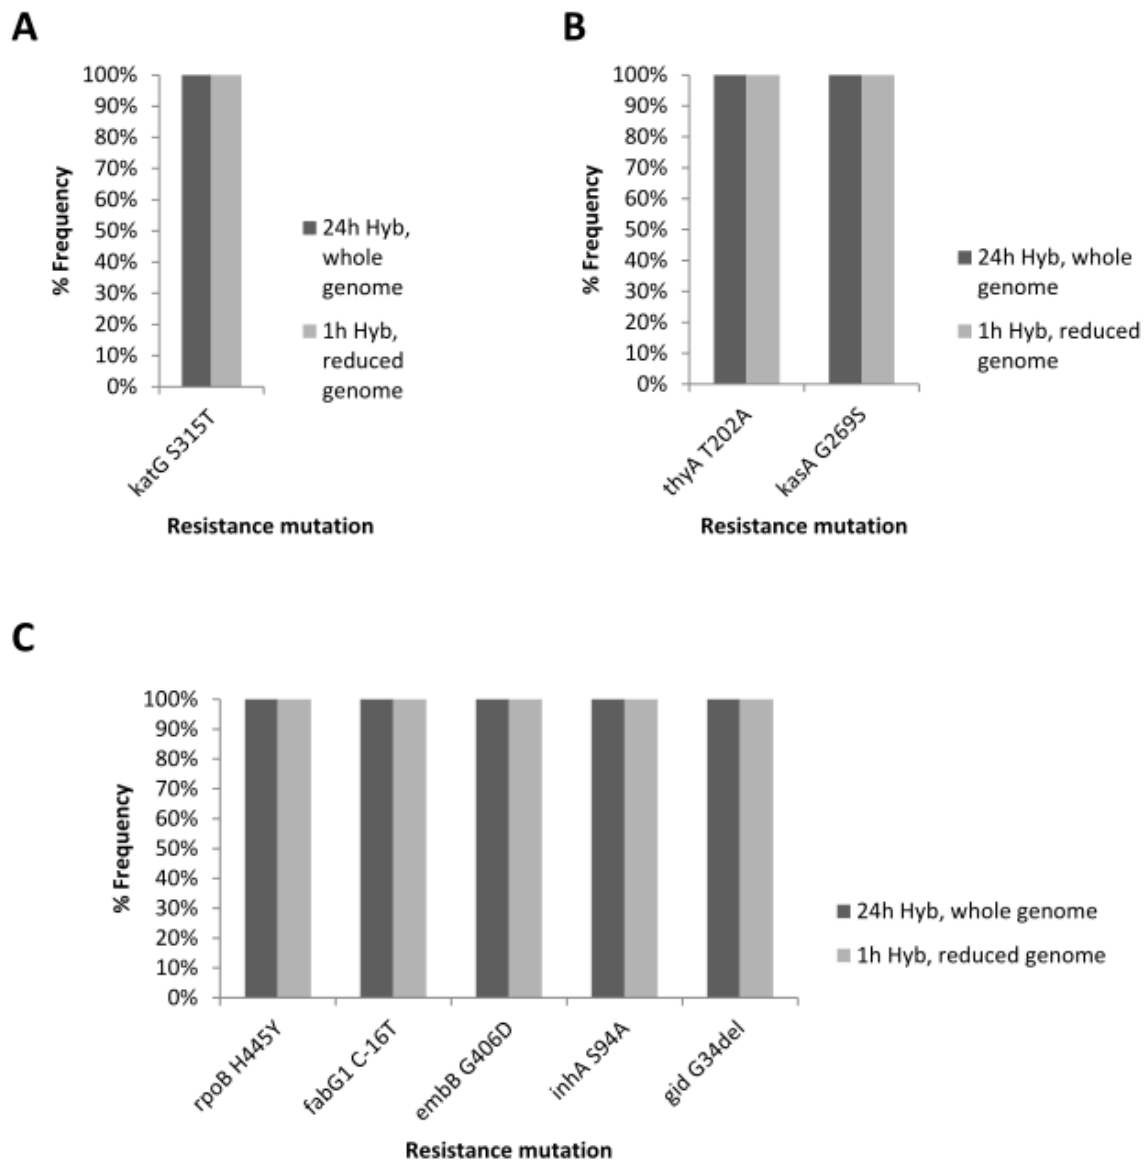

**Supplementary figure 3.** Resistance mutations identified between the samples sequenced with the whole genome RNA bait set (24h Hyb, whole genome) and the reduced bait set that only targets genes with resistance mutations (1h Hyb, reduced genome). The read frequency at each resistance site is plotted for patients (A) RF002AH, (B) BH001MC and (C) WH006AW.

A

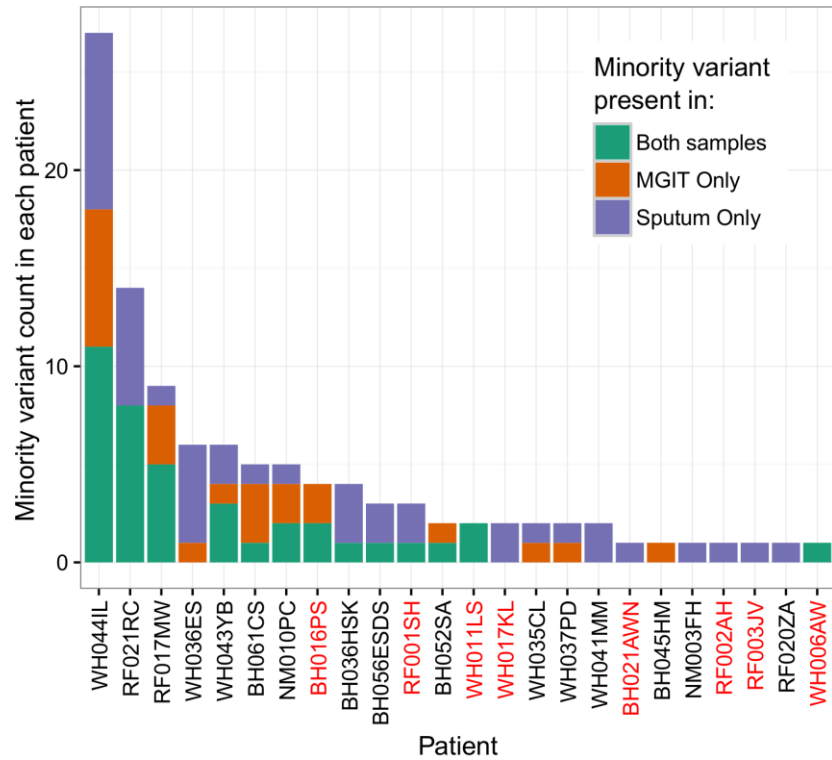

B

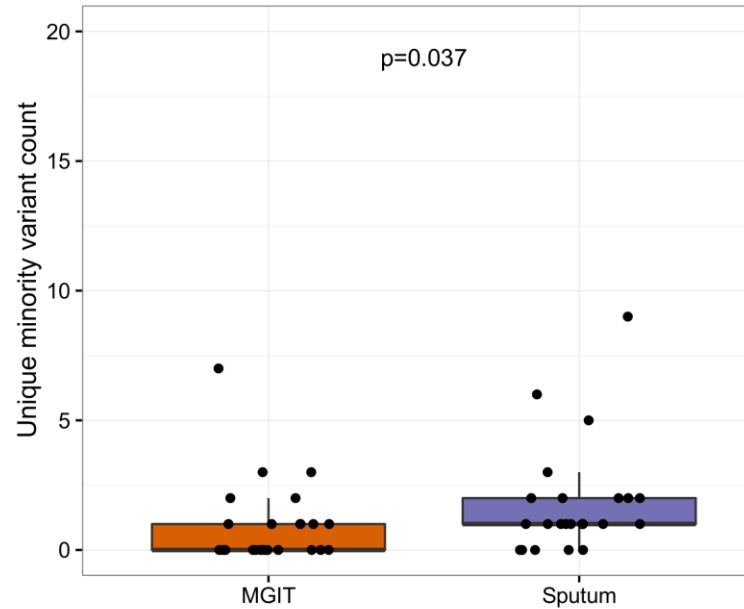

**Supplementary figure 4.** (A) Histogram of the minor variants count in each sample for both MGIT and sputum samples. Bars are coloured as to whether the variant is shared in both paired samples or is unique to the MGIT or sputum sample. Patient identifiers are highlighted red if MGIT sample was prepared using SureSelectXT enrichment and in black if they were prepared without enrichment. (B) Boxplot showing the number of unique minor variants present in either the MGIT or sputum sample.

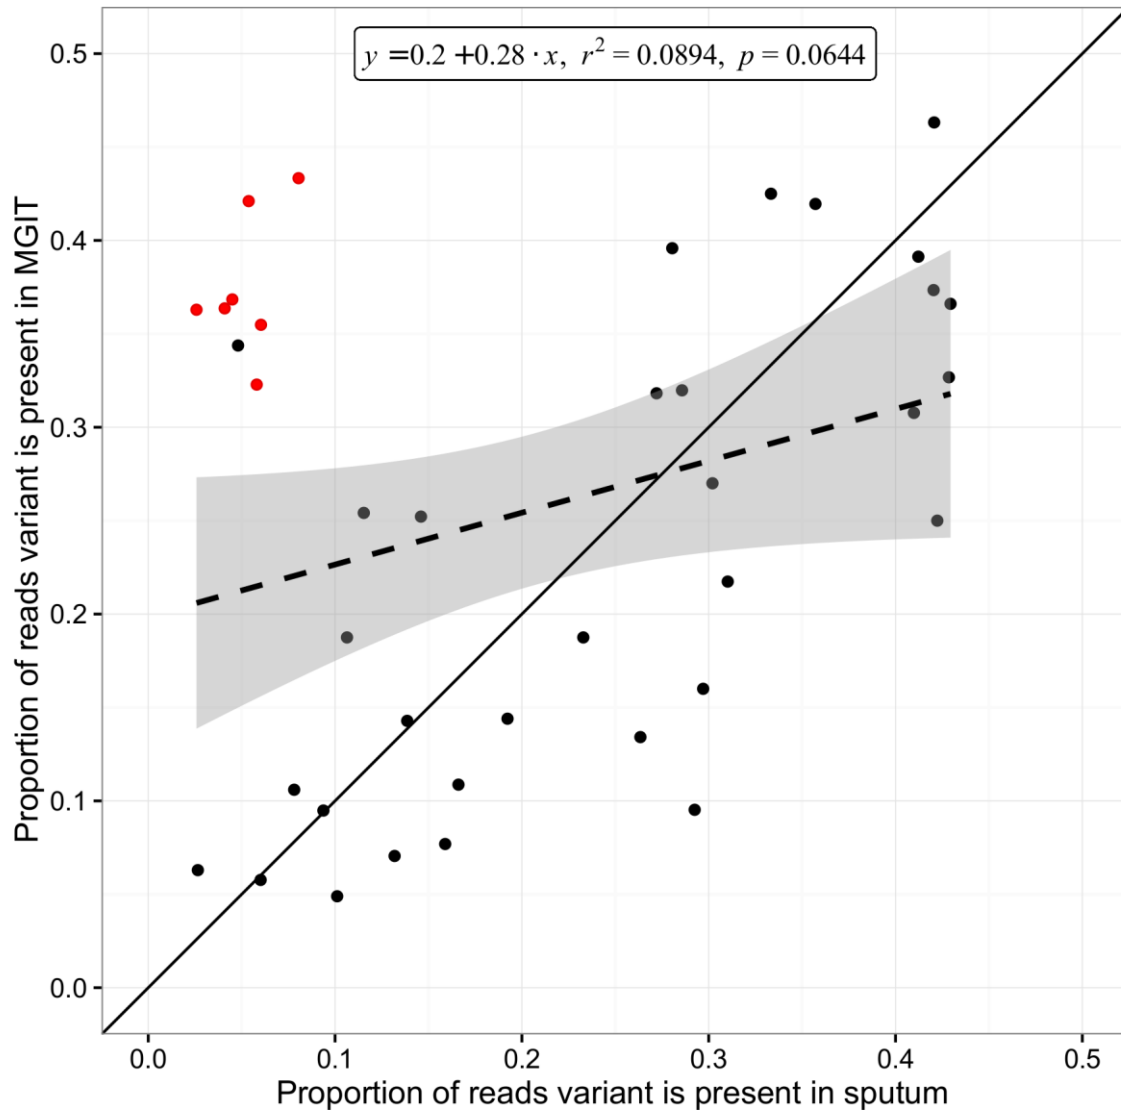

**Supplementary figure 5.** Correlation of minor variant read frequencies for shared variants between pairs of samples from the same individual. All individuals are plotted in the same graph with shared variants from patient WH044IL highlighted in red.

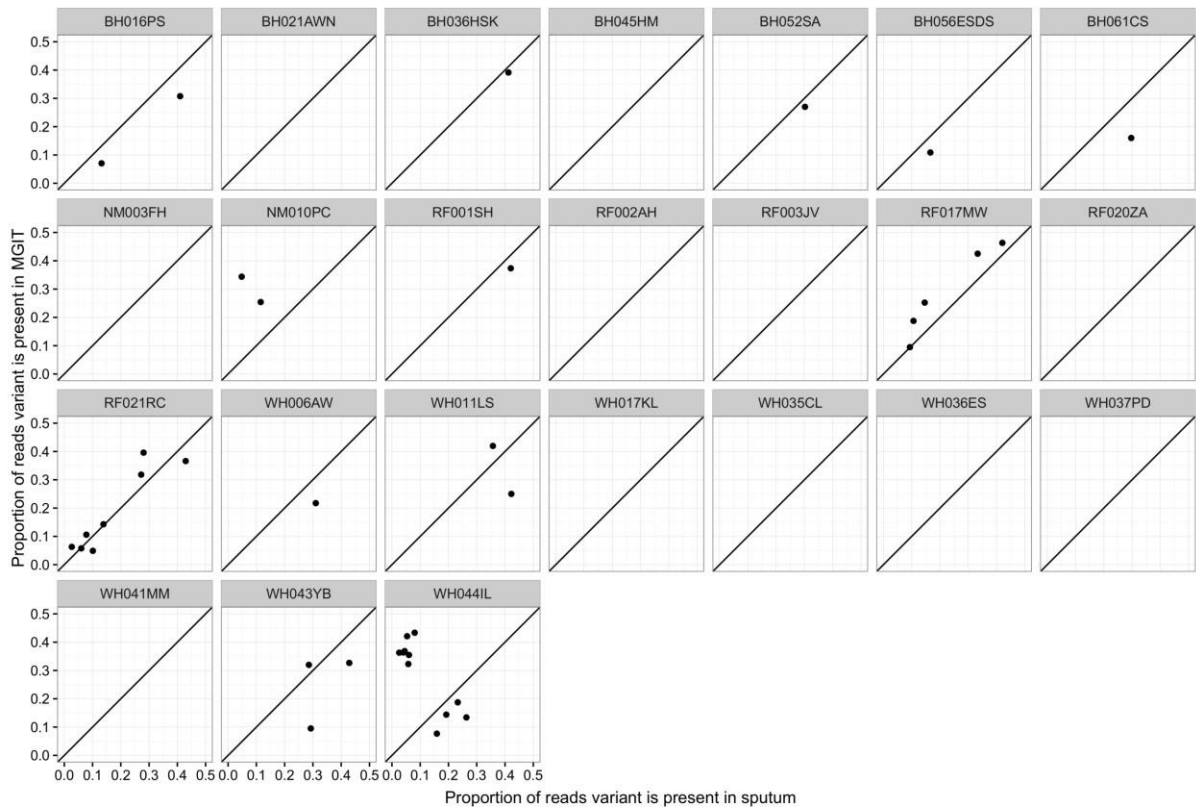

**Supplementary figure 6.** Correlation of minor variant read frequencies for shared variants between pairs of the samples as from figure 6 but instead stratified by individual patients.
